# Supplementary material for: An Easy Approach to Control β-Phase Formation in PFO Films for Optimized Emission Properties
Source: PubMed Central journal article supplement (PMC6155933; doi:10.3390/molecules22020315), 2017-02-18
Supplement: molecules-22-00315-s001.pdf [file molecules-22-00315-s001.pdf]

# Supplementary Materials: An Easy Approach to Control $\beta$ -Phase Formation in PFO Films for Optimized Emission Properties

Qi Zhang, Lang Chi, Gang Hai, Yueting Fang, Xiangchun Li, Ruidong Xia, Wei Huang and Erdan Gu

## Calculation of $\beta$ -phase Fraction

The absorption spectra of mixed-phase PFO films are understood to comprise a linear superposition of glassy and  $\beta$ -phase contributions. To estimate the fraction of  $\beta$ -phase chain segments (hereafter simply referred to as “ $\beta$ -phase fraction”) in a PFO thin film, the absorption spectrum of the  $\beta$ -phase chain segments was extracted by normalizing the corresponding mixed phase and reference glassy absorption spectra at  $\sim 345$  nm, followed by subtraction. The  $\beta$ -phase fraction is estimated from the ratio of integrated spectral areas of the  $\beta$ -phase,  $A_\beta$ , and the mixed-phase,  $A_{mixed}$ , (where  $A_{mixed} = A_{glassy} + A_\beta$ ) absorption spectra, taking into account that the relative difference in oscillator strength,  $f_{osc}$ , used time-dependent density functional theory (DFT) to estimate  $f_{osc}^\beta = 1.08 \times f_{osc}^{glassy}$ . Consequently, the  $\beta$ -phase fractions in PFO films were calculated by Equation (1):

$$\beta \text{ phase fraction} = \frac{A_\beta}{A_{mixed}} = \frac{A_\beta}{A_\beta + ((A_{mixed} - A_\beta) \times 1.08)} \quad (1)$$

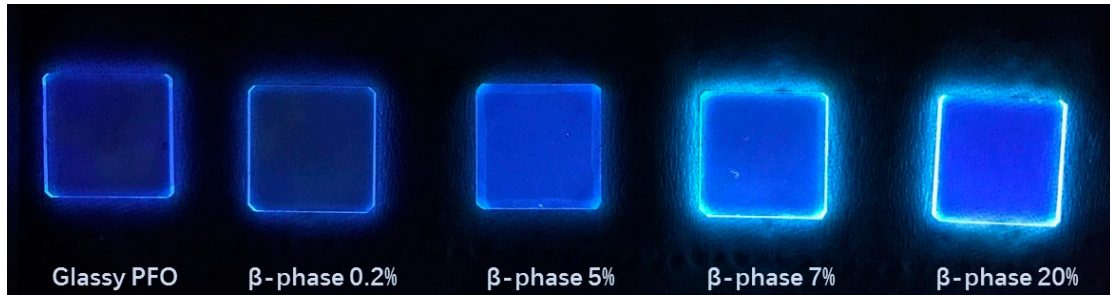

**Figure S1.** Images of glassy PFO films and PFO film with various  $\beta$ -phase fractions when exposed under 365 nm flashlight.

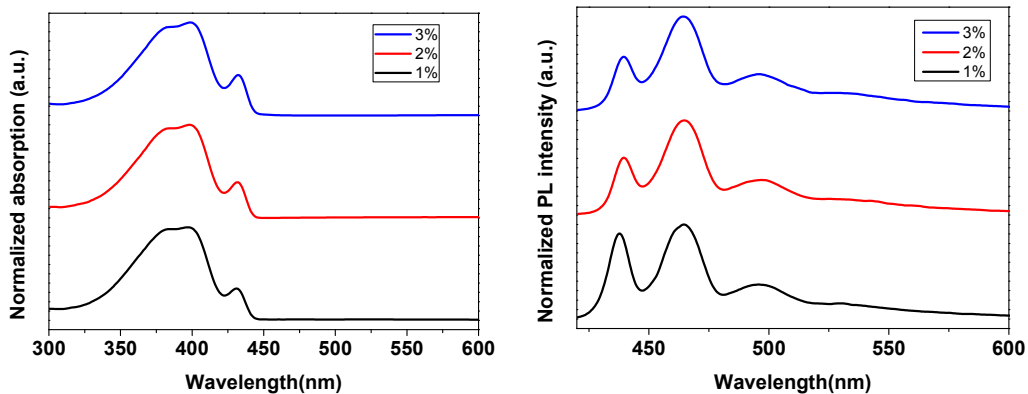

**Figure S2.** Normalized absorption and PL of the films spin-coated from mixed PFO solution with 1, 2 and 3 vol % paraffin oil.

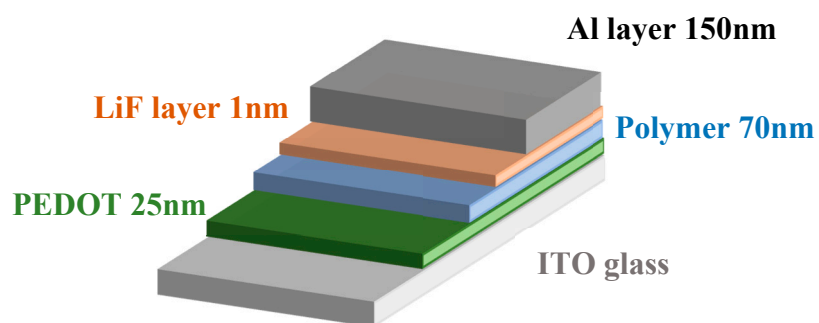

**Figure S3.** OLED device structure.

**Table S1.** Values of the PLQE (Photoluminescence quantum efficiency) and  $\beta$ -phase fraction of PFO film samples made from different solution with paraffin oil volume percentages.

| Paraffin Oil Volume Percentage (vol%) | $\beta$ -Phase Fraction (%) | PLQE (%) |
|---------------------------------------|-----------------------------|----------|
| 0                                     | 0                           | 49       |
| 0.05                                  | 0.2                         | 51       |
| 0.07                                  | 0.5                         | 53       |
| 0.09                                  | 1.5                         | 52       |
| 0.11                                  | 2                           | 55       |
| 0.13                                  | 4                           | 61       |
| 0.15                                  | 5                           | 66       |
| 0.30                                  | 7                           | 51       |
| 0.50                                  | 20                          | 50       |
